# Supplementary material
Source: publisher figshare collection journal article supplement (https://gsajournals.figshare.com/ndownloader/files/21214989)
Supplement: Supplementary file 1 [file 21214989]

"Table S11. F34 and F39-43 genetic correlations in locomotor activity, coat color, and body weight.",,,,
,,,,
Phenotype,rG,se,lrt-rg 1 pval,lrt-rg 0 pval
"Locomotor day 1, quantile normalized",0.967592,0.235799,0.4196,2.94E-06
"Locomotor day 2, quantile normalized",0.988098,0.187282,0.4749,3.51E-05
"Locomotor day 3, quantile normalized",0.577206,0.219689,0.02211,0.01007
"Coat color, albino",0.967444,0.040515,0.227,0
"Coat color, agouti",0.970642,0.037202,0.2052,0
Body weight,0.710965,0.248879,0.13,0.004852
